# Supplementary material for: Association Between Household Income and Self-Perceived Health Status and Poor Mental and Physical Health Among Cancer Survivors
Source: Frontiers journal article supplement (doi:10.3389/fpubh.2021.752868), 2021-12-07
Supplement: Data_Sheet_1.PDF [file Data_Sheet_1.PDF]

**Table 1. Sociodemographic characteristics of survivors of various cancers**

|                                | Thyroid        | Colon          | Lung           | Cervical       | Breast          | Prostate       | Ovarian        |
|--------------------------------|----------------|----------------|----------------|----------------|-----------------|----------------|----------------|
| N (%)                          | 1195<br>(2.0)  | 3074<br>(5.2)  | 1252<br>(2.1)  | 3512<br>(6.0)  | 10314<br>(17.6) | 5713<br>(9.8)  | 1304<br>(2.2)  |
| Age (mean, SD)                 | 59.1<br>(13.9) | 70.5<br>(12.8) | 68.9<br>(11.7) | 53.7<br>(15.2) | 67.4<br>(13.2)  | 72.2<br>(9.6)  | 60.2<br>(15.5) |
| <b>Sex</b>                     |                |                |                |                |                 |                |                |
| Female                         | 979<br>(81.9)  | 1810<br>(58.9) | 772<br>(61.7)  | 3512<br>(99.6) | 10248<br>(99.4) |                | 1304<br>(99.8) |
| Male                           | 216<br>(18.1)  | 1264<br>(41.1) | 480<br>(38.3)  |                | 66<br>(0.6)     | 5713<br>(99.8) |                |
| <b>Race, Ethnicity</b>         |                |                |                |                |                 |                |                |
| White only, Non-Hispanic       | 1018<br>(85.2) | 2597<br>(84.5) | 1073<br>(85.7) | 2867<br>(81.3) | 8801<br>(85.3)  | 4713<br>(82.4) | 1067<br>(81.6) |
| Black only, Non-Hispanic       | 55 (4.6)       | 210<br>(6.8)   | 86<br>(6.9)    | 202<br>(5.7)   | 638<br>(6.2)    | 523<br>(9.1)   | 80 (6.1)       |
| Hispanic                       | 62 (5.2)       | 109<br>(3.6)   | 26<br>(2.1)    | 194<br>(5.5)   | 355<br>(3.4)    | 193<br>(3.4)   | 62 (4.7)       |
| Other race only, Non-Hispanic  | 41 (3.4)       | 66<br>(2.2)    | 33<br>(2.6)    | 138<br>(3.9)   | 275<br>(2.7)    | 148<br>(2.6)   | 43 (3.3)       |
| Multi-racial, Non-Hispanic     | 12 (1.0)       | 49<br>(1.6)    | 20<br>(1.6)    | 106<br>(3.0)   | 160<br>(1.6)    | 72 (1.3)       | 46 (3.5)       |
| <b>Marital status</b>          |                |                |                |                |                 |                |                |
| Married                        | 715<br>(59.8)  | 1479<br>(48.1) | 560<br>(44.7)  | 1510<br>(42.8) | 4642<br>(45)    | 3877<br>(67.7) | 558<br>(42.7)  |
| Other                          | 480<br>(40.2)  | 1595<br>(51.9) | 692<br>(55.3)  | 2016<br>(57.2) | 5672<br>(55)    | 1846<br>(32.3) | 749<br>(57.3)  |
| <b>Education</b>               |                |                |                |                |                 |                |                |
| Less than High School          | 66 (5.5)       | 405<br>(13.2)  | 212<br>(16.9)  | 424<br>(12.0)  | 832<br>(8.1)    | 646<br>(11.3)  | 159<br>(12.2)  |
| High School                    | 336<br>(28.1)  | 1057<br>(34.4) | 468<br>(37.4)  | 1164<br>(33.0) | 3248<br>(31.5)  | 1566<br>(27.4) | 429<br>(32.8)  |
| Some College                   | 356<br>(29.8)  | 816<br>(26.6)  | 326<br>(26.0)  | 1169<br>(33.2) | 2962<br>(28.7)  | 1241<br>(21.7) | 375<br>(28.7)  |
| College                        | 432<br>(36.2)  | 786<br>(25.6)  | 242<br>(19.3)  | 764<br>(21.7)  | 3258<br>(31.6)  | 2263<br>(39.5) | 341<br>(26.1)  |
| <b>Income</b>                  |                |                |                |                |                 |                |                |
| Less than \$15,000             | 114<br>(9.5)   | 403<br>(13.1)  | 190<br>(15.2)  | 666<br>(18.9)  | 1159<br>(11.2)  | 397<br>(6.9)   | 227<br>(17.4)  |
| \$15,000 to less than \$25,000 | 173<br>(14.5)  | 666<br>(21.7)  | 279<br>(22.3)  | 743<br>(21.1)  | 1946<br>(18.9)  | 917<br>(16.0)  | 295<br>(22.6)  |
| \$25,000 to less than \$35,000 | 112<br>(9.4)   | 401<br>(13.0)  | 189<br>(15.1)  | 400<br>(11.3)  | 1287<br>(12.5)  | 754<br>(13.2)  | 132<br>(10.1)  |
| \$35,000 to less than \$50,000 | 144<br>(12.1)  | 408<br>(13.3)  | 151<br>(12.1)  | 449<br>(12.7)  | 1392<br>(13.5)  | 959<br>(16.8)  | 173<br>(13.2)  |

|                                  |               |                |               |                |                |                |               |
|----------------------------------|---------------|----------------|---------------|----------------|----------------|----------------|---------------|
| \$50,000 or more                 | 502<br>(42.0) | 709<br>(23.1)  | 223<br>(17.8) | 890<br>(25.2)  | 2755<br>(26.7) | 2091<br>(36.5) | 293<br>(22.4) |
| <b>Health care coverage</b>      |               |                |               |                |                |                |               |
| Have health care coverage        | 700<br>(58.6) | 796<br>(25.9)  | 359<br>(28.7) | 2147<br>(60.9) | 3605<br>(35.0) | 1060<br>(18.5) | 640<br>(49.0) |
| Do not have health care coverage | 54<br>(4.5)   | 75<br>(2.4)    | 28<br>(2.2)   | 506<br>(14.4)  | 332<br>(3.2)   | 84<br>(1.5)    | 138<br>(10.6) |
| Don't know/Not sure/Refused      | 441<br>(36.9) | 2203<br>(71.7) | 865<br>(69.1) | 873<br>(24.8)  | 6377<br>(61.8) | 4579<br>(80.0) | 529<br>(40.4) |

**Table 2: Odds of Reporting Poor Health-Related Quality of Life among Cancer Survivors**

| Cancer Site     | Income                         | OR <sup>1</sup> [95% CI <sup>1</sup> ] | OR <sup>2</sup> [95% CI <sup>2</sup> ] | OR <sup>3</sup> [95% CI <sup>3</sup> ] |
|-----------------|--------------------------------|----------------------------------------|----------------------------------------|----------------------------------------|
| Thyroid         | Less than \$15,000*            | Ref                                    | Ref                                    | Ref                                    |
| <i>n</i> = 1195 | \$15,000 to less than \$25,000 | 0.30 [0.11, 0.81]                      | 0.56 [0.22, 1.42]                      | 0.61 [0.22, 1.70]                      |
|                 | \$25,000 to less than \$35,000 | 0.30 [0.09, 1.06]                      | 0.53 [0.16, 1.73]                      | 0.37 [0.11, 1.26]                      |
|                 | \$35,000 to less than \$50,000 | 0.14 [0.04, 0.51]                      | 0.45 [0.16, 1.24]                      | 0.50 [0.16, 1.53]                      |
|                 | \$50,000 or more               | 0.13 [0.04, 0.40]                      | 0.21 [0.08, 0.57]                      | 0.51 [0.18, 1.46]                      |
|                 |                                |                                        |                                        |                                        |
| Colon           | Less than \$15,000             | Ref                                    | Ref                                    | Ref                                    |
| <i>n</i> = 3074 | \$15,000 to less than \$25,000 | 0.64 [0.35, 1.17]                      | 0.64 [0.32, 1.28]                      | 0.85 [0.39, 1.85]                      |
|                 | \$25,000 to less than \$35,000 | 0.39 [0.18, 0.86]                      | 0.59 [0.25, 1.40]                      | 0.36 [0.13, 1.02]                      |
|                 | \$35,000 to less than \$50,000 | 0.33 [0.15, 0.69]                      | 0.54 [0.25, 1.19]                      | 0.58 [0.24, 1.37]                      |
|                 | \$50,000 or more               | 0.19 [0.09, 0.40]                      | 0.20 [0.09, 0.42]                      | 0.43 [0.18, 1.01]                      |
|                 |                                |                                        |                                        |                                        |
| Lung            | Less than \$15,000             | Ref                                    | Ref                                    | Ref                                    |
| <i>n</i> = 1252 | \$15,000 to less than \$25,000 | 0.48 [0.22, 1.03]                      | 0.40 [0.15, 1.07]                      | 0.54 [0.15, 1.90]                      |
|                 | \$25,000 to less than \$35,000 | 0.36 [0.14, 0.89]                      | 1.7 [0.46, 5.95]                       | 0.58 [0.14, 2.33]                      |
|                 | \$35,000 to less than \$50,000 | 0.30 [0.11, 0.78]                      | 0.22 [0.06, 0.72]                      | 0.09 [0.02, 0.55]                      |
|                 | \$50,000 or more               | 0.20 [0.08, 0.50]                      | 0.41 [0.13, 1.24]                      | 0.05 [0.01, 0.34]                      |
|                 |                                |                                        |                                        |                                        |
| Cervical        | Less than \$15,000             | Ref                                    | Ref                                    | Ref                                    |
| <i>n</i> = 3512 | \$15,000 to less than \$25,000 | 0.44 [0.31, 0.63]                      | 0.53 [0.38, 0.74]                      | 0.74 [0.53, 1.03]                      |
|                 | \$25,000 to less than \$35,000 | 0.21 [0.13, 0.35]                      | 0.36 [0.23, 0.55]                      | 0.40 [0.26, 0.60]                      |
|                 | \$35,000 to less than \$50,000 | 0.18 [0.11, 0.30]                      | 0.22 [0.14, 0.34]                      | 0.28 [0.18, 0.43]                      |
|                 | \$50,000 or more               | 0.09 [0.06, 0.16]                      | 0.19 [0.12, 0.28]                      | 0.27 [0.18, 0.39]                      |
|                 |                                |                                        |                                        |                                        |
| Breast          | Less than \$15,000             | Ref                                    | Ref                                    | Ref                                    |

|                  |                                |                   |                   |                   |
|------------------|--------------------------------|-------------------|-------------------|-------------------|
| <i>n</i> = 10314 | \$15,000 to less than \$25,000 | 0.49 [0.34, 0.70] | 0.52 [0.36, 0.75] | 0.69 [0.47, 1.02] |
|                  | \$25,000 to less than \$35,000 | 0.28 [0.18, 0.44] | 0.35 [0.23, 0.54] | 0.31 [0.20, 0.50] |
|                  | \$35,000 to less than \$50,000 | 0.21 [0.13, 0.33] | 0.29 [0.19, 0.43] | 0.30 [0.19, 0.46] |
|                  | \$50,000 or more               | 0.16 [0.10, 0.25] | 0.20 [0.13, 0.30] | 0.23 [0.15, 0.35] |
| Prostate         | Less than \$15,000             | Ref               | Ref               | Ref               |
| <i>n</i> = 5713  | \$15,000 to less than \$25,000 | 1.70 [0.70, 4.10] | 0.99 [0.40, 2.48] | 0.41 [0.12, 1.34] |
|                  | \$25,000 to less than \$35,000 | 0.54 [0.20, 1.52] | 0.52 [0.20, 1.41] | 0.14 [0.04, 0.53] |
|                  | \$35,000 to less than \$50,000 | 0.41 [0.15, 1.13] | 0.40 [0.16, 0.99] | 0.32 [0.11, 0.95] |
|                  | \$50,000 or more               | 0.14 [0.05, 0.39] | 0.36 [0.15, 0.88] | 0.19 [0.06, 0.57] |
| Ovarian          | Less than \$15,000             | Ref               | Ref               | Ref               |
| <i>n</i> = 1304  | \$15,000 to less than \$25,000 | 0.33 [0.17, 0.64] | 0.67 [0.36, 1.25] | 0.40 [0.20, 0.81] |
|                  | \$25,000 to less than \$35,000 | 0.38 [0.16, 0.89] | 0.42 [0.19, 0.95] | 0.47 [0.20, 1.13] |
|                  | \$35,000 to less than \$50,000 | 0.33 [0.14, 0.75] | 0.30 [0.14, 0.68] | 0.14 [0.06, 0.35] |
|                  | \$50,000 or more               | 0.27 [0.13, 0.60] | 0.39 [0.19, 0.81] | 0.20 [0.09, 0.45] |

<sup>1,2,3</sup> : Adjusted odds ratio

^ 95% Confidence Interval

\* Reference Group

OR<sup>1</sup> and 95% CI<sup>1</sup>: Odds of reporting "poor" self-perceived health status

OR<sup>2</sup> and 95% CI<sup>2</sup>: Odds of reporting more than two weeks per month of bad physical health days

OR<sup>3</sup> and 95% CI<sup>3</sup>: Odds of reporting more than two weeks per month of bad mental health days

**Supplementary Table 1. Health Related Quality of Life based sociodemographic characteristics of cancer survivors**

|                                | General Health    |                  |         | Physical Health   |                  |         | Mental Health     |                  |         |
|--------------------------------|-------------------|------------------|---------|-------------------|------------------|---------|-------------------|------------------|---------|
|                                | Good              | Not good         | p-value | Good              | Not good         | p-value | Good              | Not good         | p-value |
| N (%)                          |                   |                  |         |                   |                  |         |                   |                  |         |
| Age (mean, SD)                 | 66.3<br>(13.5)    | 67.3<br>(13.4)   | < .01   | 66.9 (13.4)       | 66.0<br>(13.7)   | < .01   | 67.6<br>(13.1)    | 59.2<br>(14.5)   | < .01   |
| <b>Sex</b>                     |                   |                  |         |                   |                  |         |                   |                  |         |
| Female                         | 12,569<br>(67.5%) | 6,066<br>(32.5%) | 0.36    | 14,443<br>(69.7%) | 4,192<br>(74.0%) | < .01   | 16,076<br>(69.0%) | 2,559<br>(82.6%) | < .01   |
| Male                           | 5,186<br>(66.9%)  | 2,570<br>(33.1%) |         | 6,286<br>(30.3%)  | 1,470<br>(26.0%) |         | 7,218<br>(31.0%)  | 538<br>(17.4%)   |         |
| <b>Race, Ethnicity</b>         |                   |                  |         |                   |                  |         |                   |                  |         |
| White only, Non-Hispanic       | 15,319<br>(86.3%) | 6,817<br>(78.9%) | < .01   | 17,562<br>(84.7%) | 4,574<br>(80.8%) | < .01   | 19,704<br>(84.6%) | 2,432<br>(78.5%) | < .01   |
| Black only, Non-Hispanic       | 1,007<br>(5.7%)   | 787<br>(9.1%)    |         | 1,382<br>(6.7%)   | 412<br>(7.3%)    |         | 1,572<br>(6.8%)   | 222<br>(7.2%)    |         |
| Hispanic                       | 535<br>(3.0%)     | 466<br>(5.4%)    |         | 705<br>(3.4%)     | 296<br>(5.2%)    |         | 813<br>(3.5%)     | 188<br>(6.1%)    |         |
| Other race only, Non-Hispanic  | 621<br>(3.5%)     | 374<br>(4.3%)    |         | 769<br>(3.7%)     | 226<br>(4.0%)    |         | 847<br>(3.6%)     | 148<br>(4.8%)    |         |
| Multi-racial, Non-Hispanic     | 273<br>(3.5%)     | 192<br>(2.2%)    |         | 311<br>(1.5%)     | 154<br>(2.7%)    |         | 358<br>(1.5%)     | 107<br>(3.5%)    |         |
| <b>Marital status</b>          |                   |                  |         |                   |                  |         |                   |                  |         |
| Married                        | 9,532<br>(71.5%)  | 3,809<br>(28.5%) | < .01   | 10,895<br>(52.6%) | 2,446<br>(43.2%) | < .01   | 12,093<br>(51.9%) | 1,248<br>(40.3%) | < .01   |
| Other                          | 8,223<br>(63.0%)  | 4,827<br>(37.0%) |         | 9,834<br>(47.4%)  | 3,216<br>(56.8%) |         | 11,201<br>(48.1%) | 1,849<br>(59.7%) |         |
| <b>Education</b>               |                   |                  |         |                   |                  |         |                   |                  |         |
| Less than High School          | 1,181<br>(6.7%)   | 1,563<br>(18.1%) | < .01   | 1,781<br>(8.6%)   | 963<br>(17.0%)   | < .01   | 2,261<br>(9.7%)   | 483<br>(15.6%)   | < .01   |
| High School                    | 5,115<br>(28.8%)  | 3,153<br>(36.5%) |         | 6,352<br>(30.6%)  | 1,916<br>(33.8%) |         | 7,242<br>(31.1%)  | 1,026<br>(33.1%) |         |
| Some College                   | 4,969<br>(28.0%)  | 2,276<br>(26.4%) |         | 5,622<br>(27.1%)  | 1,623<br>(28.7%) |         | 6,288<br>(27.0%)  | 957<br>(30.9%)   |         |
| College                        | 6,462<br>(36.4%)  | 1,624<br>(18.8%) |         | 6,936<br>(33.5%)  | 1,150<br>(20.3%) |         | 7,460<br>(32.0%)  | 626<br>(20.2%)   |         |
| Don't know/Refused             | 28<br>(0.2%)      | 20<br>(0.2%)     |         | 38<br>(0.2%)      | 10<br>(0.2%)     |         | 43<br>(0.2%)      | 5<br>(0.2%)      |         |
| <b>Income</b>                  |                   |                  |         |                   |                  |         |                   |                  |         |
| Less than \$15,000             | 1,333<br>(7.5%)   | 1,823<br>(21.1%) | < .01   | 1,903<br>(9.2%)   | 1,253<br>(22.1%) | < .01   | 2,364<br>(10.2%)  | 792<br>(25.6%)   | < .01   |
| \$15,000 to less than \$25,000 | 2,844<br>(16.0%)  | 2,175<br>(25.2%) |         | 3,619<br>(17.5%)  | 1,400<br>(24.7%) |         | 4,286<br>(18.4%)  | 733<br>(23.7%)   |         |
| \$25,000 to less than \$35,000 | 2,204<br>(12.4%)  | 1,071<br>(12.4%) |         | 2,612<br>(12.6%)  | 663<br>(11.7%)   |         | 2,930<br>(12.6%)  | 345<br>(11.1%)   |         |
| \$35,000 to less than \$50,000 | 2,714<br>(15.3%)  | 962<br>(11.1%)   |         | 3,063<br>(14.8%)  | 613<br>(10.8%)   |         | 3,356<br>(14.4%)  | 320<br>(10.3%)   |         |
| \$50,000 or more               | 6,171<br>(34.8%)  | 1,292<br>(15.0%) |         | 6,535<br>(31.5%)  | 928<br>(16.4%)   |         | 6,919<br>(29.7%)  | 544<br>(17.6%)   |         |
| Don't know/Refused             | 2,489<br>(14.0%)  | 1,313<br>(15.2%) |         | 2,997<br>(14.5%)  | 805<br>(14.2%)   |         | 3,439<br>(14.8%)  | 363<br>(11.7%)   |         |

| <b>Health care coverage</b>      |                   |                  |       |                   |                  |       |                   |                  |       |
|----------------------------------|-------------------|------------------|-------|-------------------|------------------|-------|-------------------|------------------|-------|
| Have health care coverage        | 6,478<br>(36.5%)  | 2,829<br>(32.8%) | < .01 | 7,207<br>(34.8%)  | 2,100<br>(37.1%) | < .01 | 7,709<br>(33.1%)  | 1,598<br>(51.6%) | < .01 |
| Do not have health care coverage | 689<br>(3.9%)     | 528<br>(6.1%)    |       | 848<br>(4.1%)     | 369<br>(6.5%)    |       | 835<br>(3.6%)     | 382<br>(12.3%)   |       |
| Don't know/Not sure/Refused      | 10,588<br>(59.6%) | 5,279<br>(61.1%) |       | 14,674<br>(61.1%) | 3,193<br>(56.4%) |       | 14,750<br>(63.3%) | 1,117<br>(36.1%) |       |
